# Supplementary material for: Formamide-derived “glue” for the hundred-gram scale synthesis of atomically dispersed iron–nitrogen–carbon electrocatalysts
Source: Royal Society of Chemistry journal article supplement (doi:10.1039/d1nr05209h), 2021-01-01
Supplement: d1nr05209h1.pdf [file d1nr05209h1.pdf]

**Supporting information for**

**Formamide-derived “glue” for hundred-gram scale synthesis of atomically dispersed iron-nitrogen-carbon electrocatalysts**

*Zongge Li<sup>a,b,†</sup>, Yan Ma<sup>b,†</sup>, Yiyang Wang<sup>b</sup>, Nianxi Liu<sup>a</sup>, Ying Zhang<sup>b,\*</sup>, and Guoxin Zhang<sup>a,\*</sup>*

a. Al-ion Battery Research Center, Department of Electrical Engineering and Automation, Shandong University of Science and Technology, Qingdao, Shandong 266590, P. R. China. E-mail: [zhanggx@sdust.edu.cn](mailto:zhanggx@sdust.edu.cn).

b. State Key Laboratory of Heavy Oil Processing, China University of Petroleum (East China), Qingdao, Shandong 266580, P. R. China. E-mail: [yzhang@upc.edu.cn](mailto:yzhang@upc.edu.cn).

† These authors contribute equally to this work.

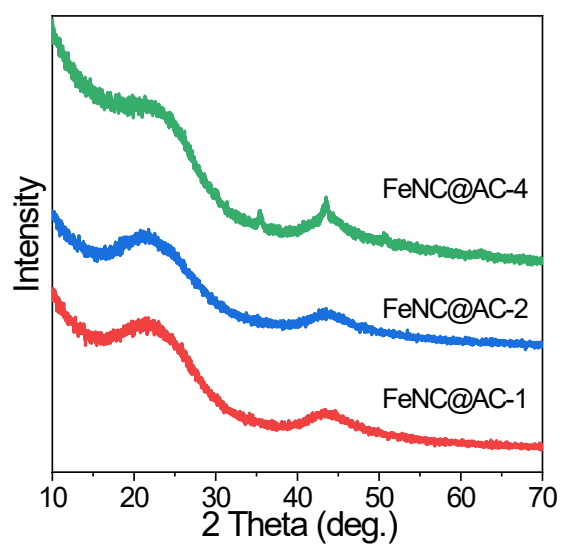

**Figure S1.** XRD curves of FeNC@AC-X, X=1, 2, or 4.

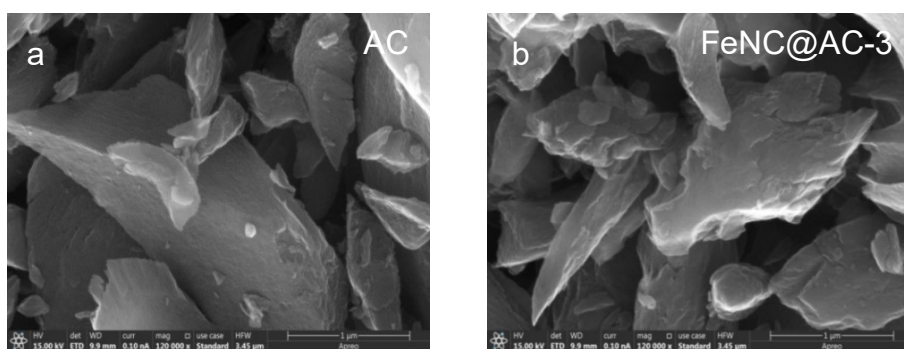

**Figure S2.** SEM images of (a) activated carbon black (AC) and (b) FeNC@AC samples.

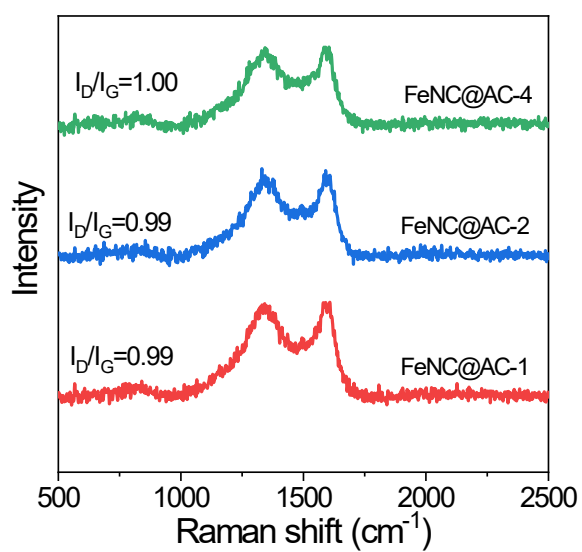

**Figure S3.** Raman spectra of FeNC@AC-X, X=1, 2, or 4.

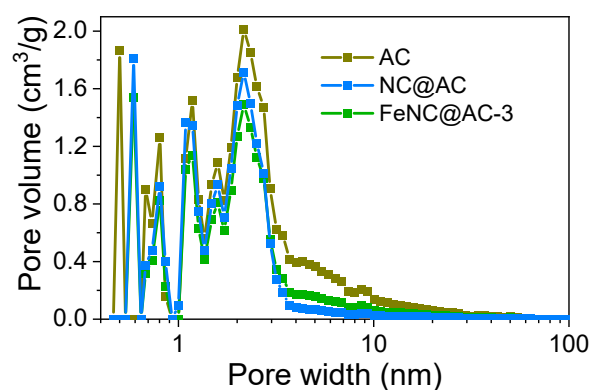

**Figure S4.** Pore distribution curves of AC, NC@AC, and FeNC@AC-3.

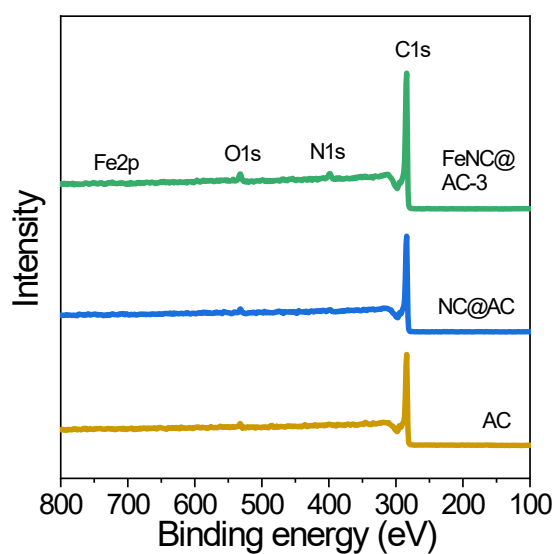

**Figure S5.** XPS survey curves of AC, NC@AC, and FeNC@AC-3.

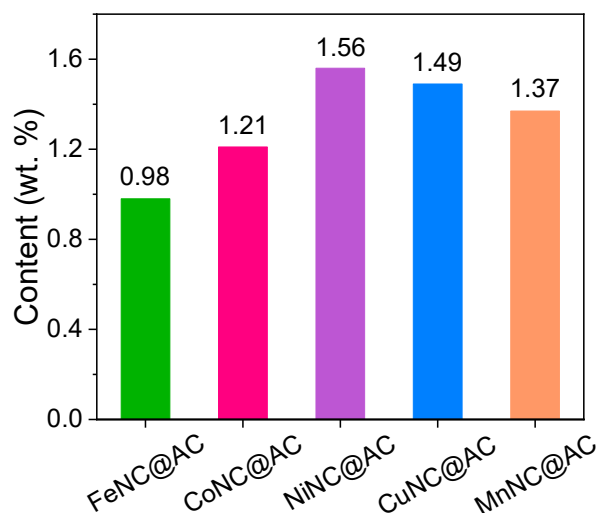

**Figure S6.** ICP element weight percentages of FeNC@AC, and other four types of as-made MNC@AC materials.

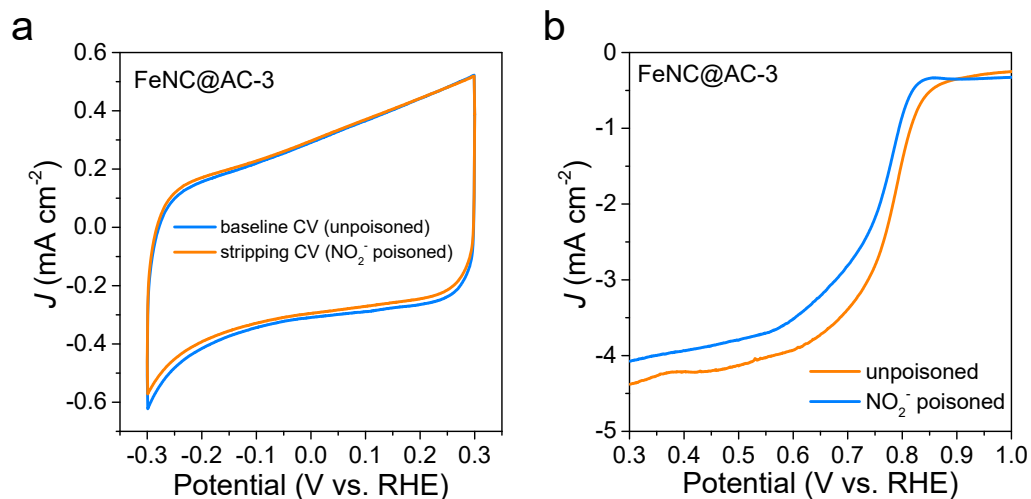

**Figure S7.** Determination of site density of FeNC@AC-3 through reversible nitrite poisoning. (a) CV curves and (b) ORR LSV curves before and after nitrite adsorption in a 0.5 M acetate buffer at pH 5.2.

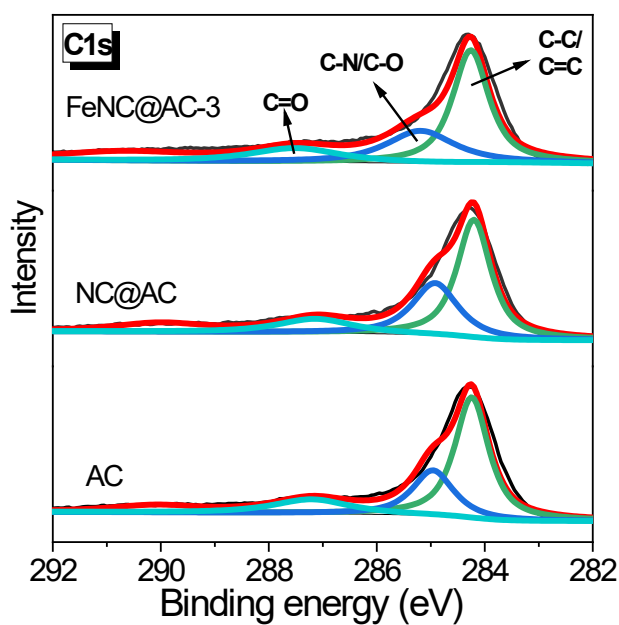

**Figure S8.** (a) XPS survey curves and (b) C1s spectra of AC, NC@AC, and FeNC@AC-3.

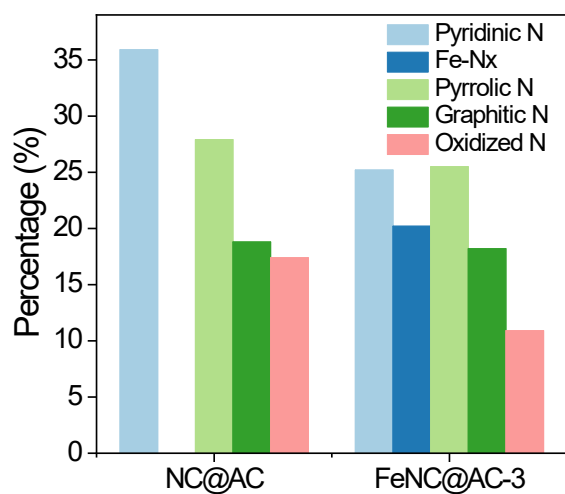

**Figure S9.** Percentages of different N species in NC@AC and FeNC@AC-3.

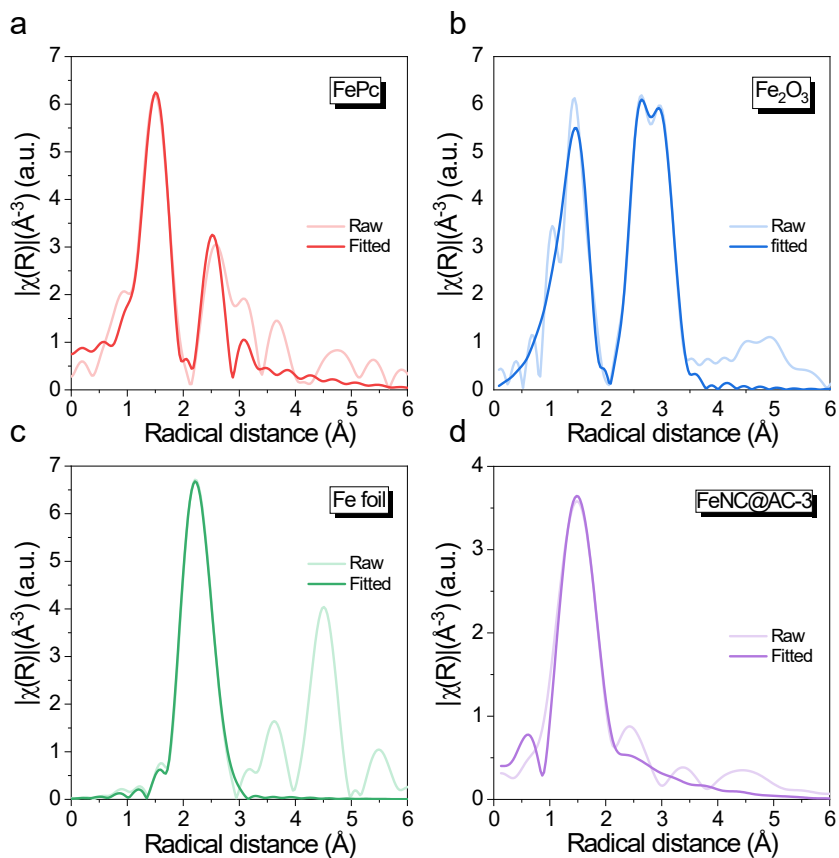

**Figure S10.** Fe K-edge EXAFS fitting curves of (a) FePc, (b) Fe<sub>2</sub>O<sub>3</sub>, (c) Fe foil, and (d) FeNC@AC-3 in R-space.

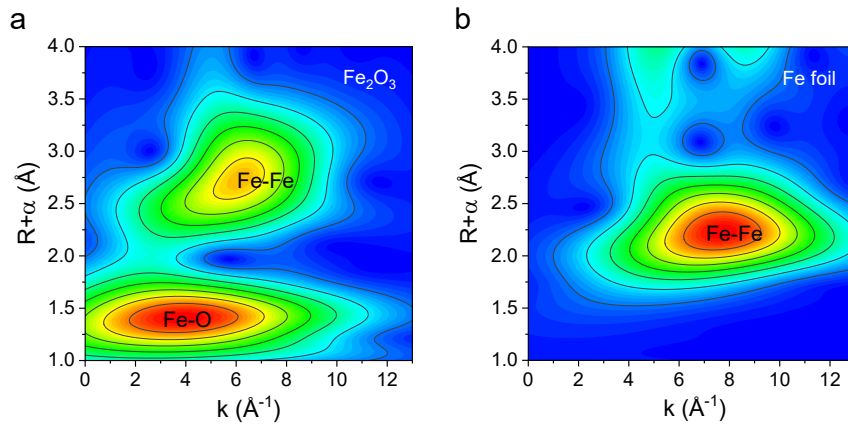

**Figure S11.** Wavelet transformed (WT) EXAFS spectra of (a)  $\text{Fe}_2\text{O}_3$  and (b) Fe foil.

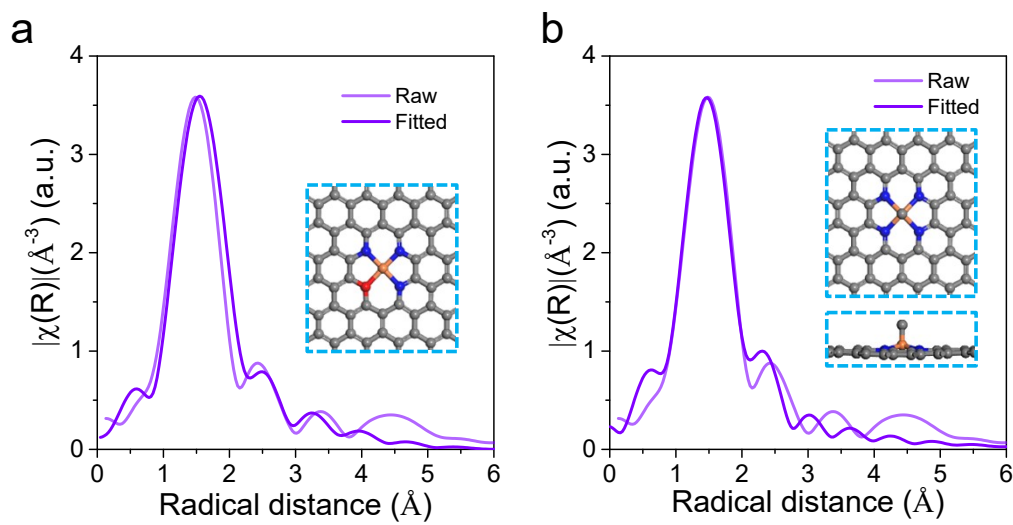

**Figure S12.** Fe k-edge EXAFS fitting curves of (a)  $\text{Fe-N}_3\text{O}_1$  and (b)  $\text{C-Fe-N}_4$  in R-space, insets show their corresponding proposed coordination structures.

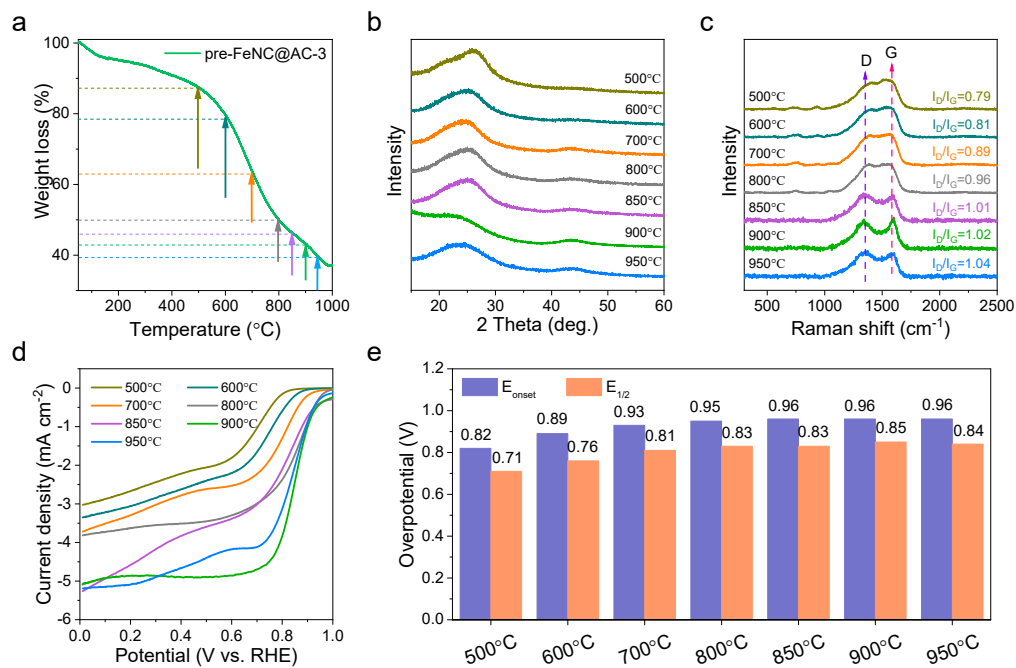

**Figure S13.** (a) TGA curve of pre-FeNC@AC-3. (b) XRD curves and (c) Raman spectra of Fe-NC@AC-3 synthesized at different temperatures. (d) ORR polarization curves of FeNC@AC-3 synthesized at different temperatures. Panel (e) shows a summary of onset potentials and half-wave potentials of Fe-NC@AC-3 synthesized at different temperatures.

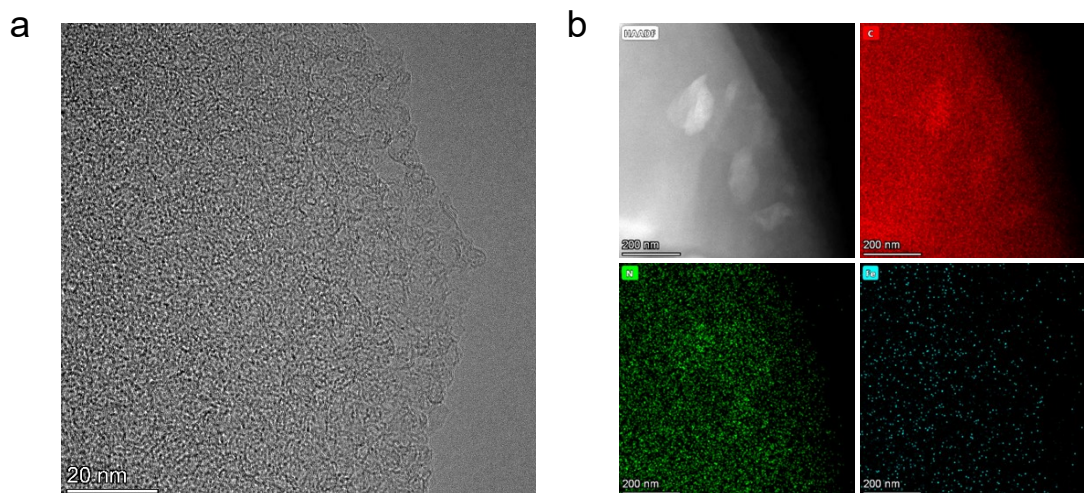

**Figure S14.** HRTEM image and EDS mapping images of FeNC@AC-3 after durability test.

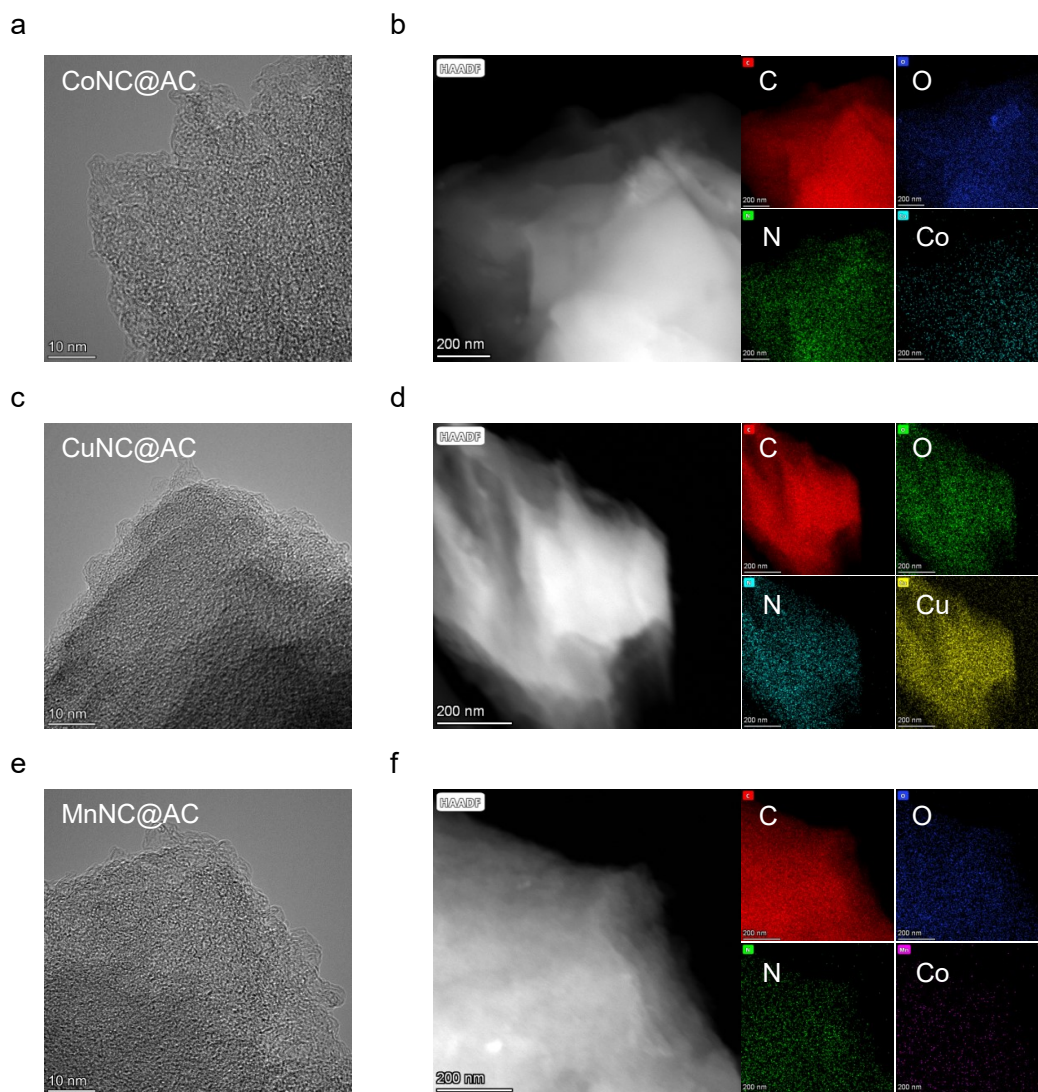

**Figure S15.** (a) HRTEM and (b) elemental mapping images of CoNC@AC sample. (c) HRTEM and (d) elemental mapping images of CuNC@AC sample. (e) HRTEM and (f) elemental mapping images of MnNC@AC sample.



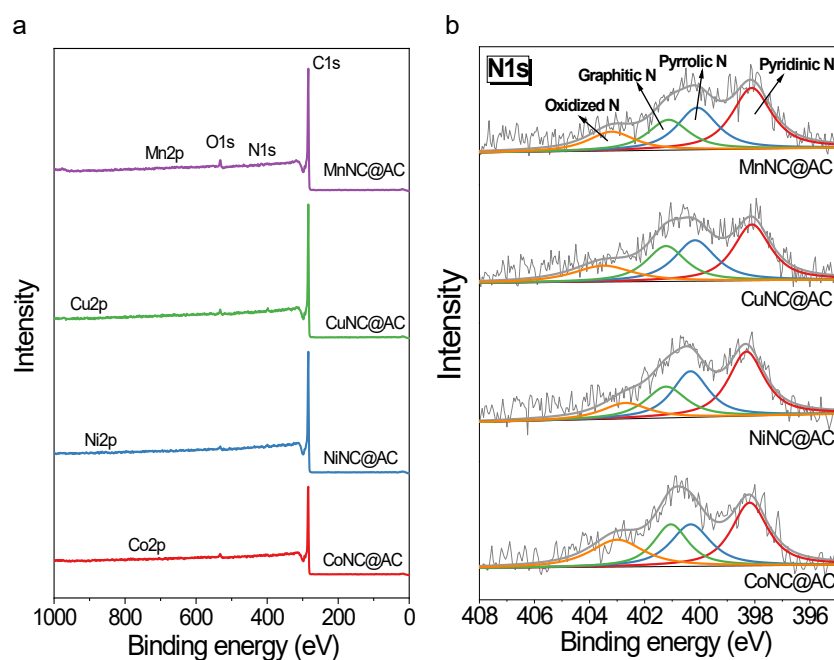

**Figure S16.** (a) XPS survey curves and (b) C1s spectra of CoNC@AC, NiNC@AC, CuNC@AC, and MnNC@AC.

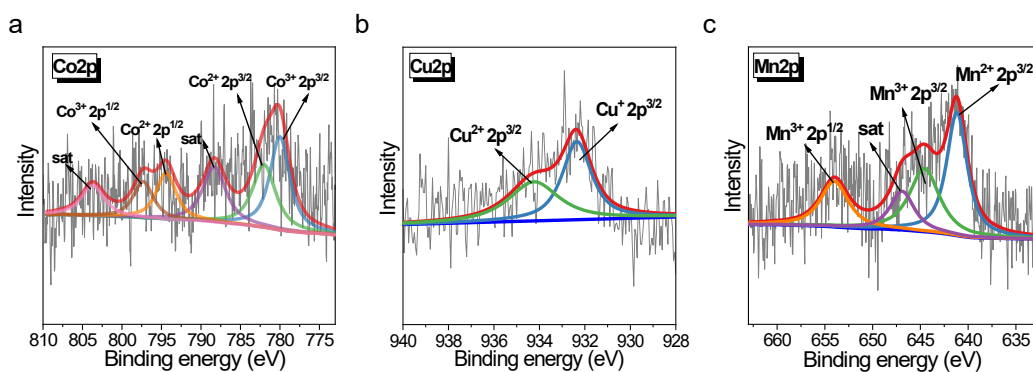

**Figure S17.** (a) Co2p spectra of CoNC@AC, (b) Cu2p spectra of CoNC@AC, and (c) Mn2p spectra of MnNC@AC

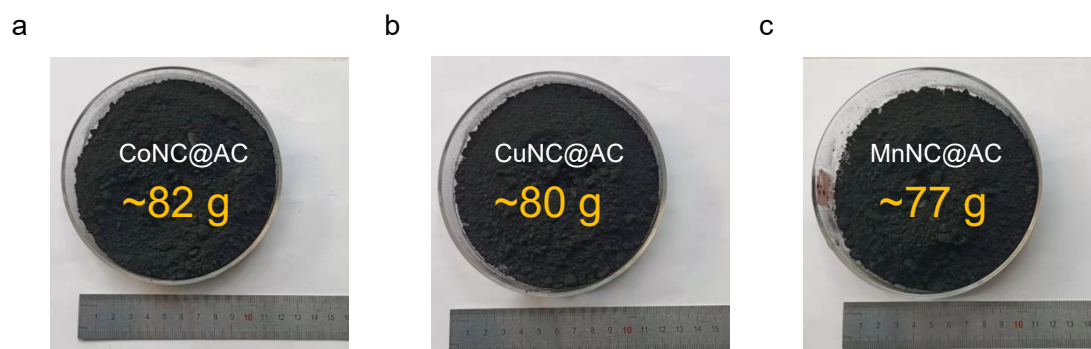

**Figure S18.** Digital image of appearance of (a) CoNC@AC, (b) CuNC@AC, and (c) MnNC@AC.



**Table S1.** XPS elemental analysis of AC, NC@AC, and FeNC@AC-3.

| Sample    | %C    | %N   | %O   | %Fe  |
|-----------|-------|------|------|------|
| AC        | 97.33 | 0.39 | 2.28 | -    |
| NC@AC     | 95.25 | 2.1  | 2.65 | -    |
| FeNC@AC-3 | 93.99 | 1.45 | 4.38 | 0.19 |

**Table S2.** A summary of site density (SD), turnover of frequency (TOF), and Fe utilization rate of FeNC@AC-3 before and after long-term use (10,000 s).

| Sample                                         | Site density (SD)/site g <sup>-1</sup> | Turnover of frequency (TOF)/s <sup>-1</sup> | Utilization rate (%)                         |
|------------------------------------------------|----------------------------------------|---------------------------------------------|----------------------------------------------|
| FeNC@AC-3                                      | 1.49×10 <sup>19</sup>                  | 1.69                                        | 16.0% (based on XPS)<br>14.9% (based on ICP) |
| FeNC@AC-3<br>after long-term use<br>(10,000 s) | 1.36×10 <sup>19</sup>                  | 1.57                                        | 14.6% (based on XPS)<br>12.9% (based on ICP) |

**Table S3.** EXAFS fitting parameters at the Fe K-edge for the FeNC@AC-3 sample with comparison to standard references of Fe foil, Fe<sub>2</sub>O<sub>3</sub>, and FePc. Comparison of Fe-N<sub>3</sub>O<sub>1</sub> and C-Fe-N<sub>4</sub> to Fe-N<sub>4</sub> coordination are also shown.

| Sample                                | Shell | N <sup>a</sup> | R(Å) <sup>b</sup> | σ <sup>2</sup> ×10 <sup>3</sup> (Å <sup>2</sup> ) <sup>c</sup> | ΔE <sub>0</sub> (eV) <sup>d</sup> | R factor |
|---------------------------------------|-------|----------------|-------------------|----------------------------------------------------------------|-----------------------------------|----------|
| Fe foil                               | Fe-Fe | 8*             | 2.47±0.01         | 4.8±0.8                                                        | 6.7±1.3                           | 0.001    |
|                                       | Fe-Fe | 6*             | 2.85±0.01         | 6.0±1.7                                                        | 5.4±2.6                           |          |
| Fe <sub>2</sub> O <sub>3</sub>        | Fe-O  | 6.1±1.1        | 1.93±0.02         | 11.7±2.7                                                       | -6.5±3.0                          | 0.014    |
|                                       | Fe-Fe | 2.6±1.4        | 2.99±0.05         | 9.8±4.9                                                        | -4.1±6.2                          |          |
|                                       | Fe-Fe | 8.4±4.1        | 3.42±0.02         | 10.3±3.3                                                       | -7.9±3.3                          |          |
| FePc                                  | Fe-N  | 4.1±0.5        | 1.99±0.02         | 8.0±3.0                                                        | 8.1±3.2                           | 0.012    |
|                                       | Fe-C  | 4.8±2.1        | 2.98±0.02         | 6.7±3.4                                                        | 7.4±3.3                           |          |
| Fe in Fe-N <sub>4</sub> for FeNC@AC-3 | Fe-N  | 3.8±0.5        | 1.98±0.02         | 5.7±4.4                                                        | -3.8±2.9                          | 0.016    |
| Fe in FeN <sub>3</sub> O structure    | Fe-N  | 3.1±0.3        | 1.97±0.05         | 6.8±4.6                                                        | -3.7±0.8                          | 0.214    |
|                                       | Fe-O  | 1.2±0.3        | 2.03±0.09         |                                                                |                                   |          |
| Fe in C-FeN <sub>4</sub> structure    | Fe-C  | 4.9±0.6        | 1.99±0.06         | 3.3±2.7                                                        | -4.5±1.2                          | 0.158    |

<sup>a</sup>CN: coordination numbers; <sup>b</sup>R: bond distance; <sup>c</sup>σ<sup>2</sup>: Debye-Waller factors; <sup>d</sup> ΔE<sub>0</sub>: the inner potential correction. R factor: goodness of fit. S<sub>0</sub><sup>2</sup> was set to 0.729 (Fe), according to the experimental EXAFS fit of metal foil reference by fixing CN as the known crystallographic value.

**Table S4.** XPS elemental analysis of CoNC@AC, NiNC@AC, CuNC@AC, and MnNC@AC.

| <b>Sample</b> | <b>%C</b> | <b>%N</b> | <b>%O</b> | <b>%M (M=Co, Ni, Cu, and Mn)</b> |
|---------------|-----------|-----------|-----------|----------------------------------|
| CoNC@AC       | 96.72     | 1.16      | 1.90      | 0.22                             |
| NiNC@AC       | 95.95     | 1.34      | 2.5       | 0.21                             |
| CuNC@AC       | 95.8      | 1.54      | 2.49      | 0.16                             |
| MnNC@AC       | 94.56     | 1.12      | 4.1       | 0.22                             |
